# Supplementary material for: iRGD-mediated reduction-responsive DSPE–PEG/LA–PLGA–TPGS mixed micelles used in the targeted delivery and triggered release of docetaxel in cancer
Source: Royal Society of Chemistry journal article supplement (doi:10.1039/c5ra19814c), 2016-01-01
Supplement: c5ra19814c1.pdf [file c5ra19814c1.pdf]

## Figures

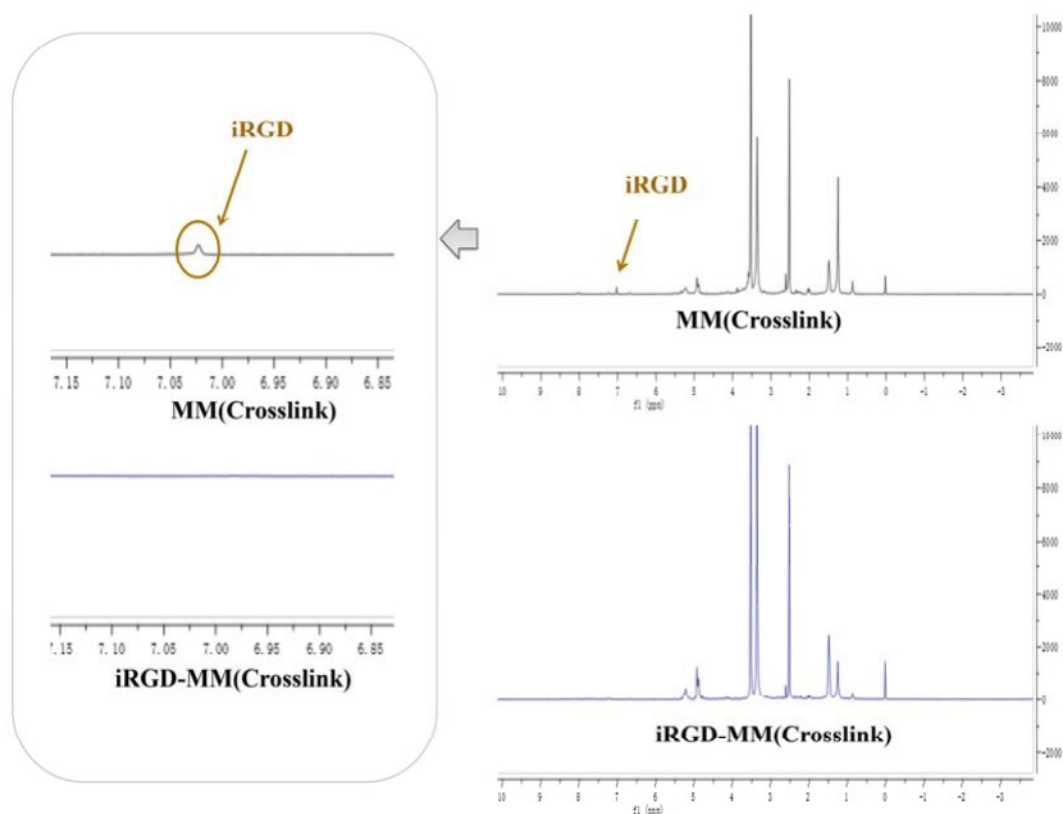

**Fig. S1**

The <sup>1</sup>H NMR spectra of MM(Blank/Crosslink) and iRGD-MM(Blank/Crosslink).

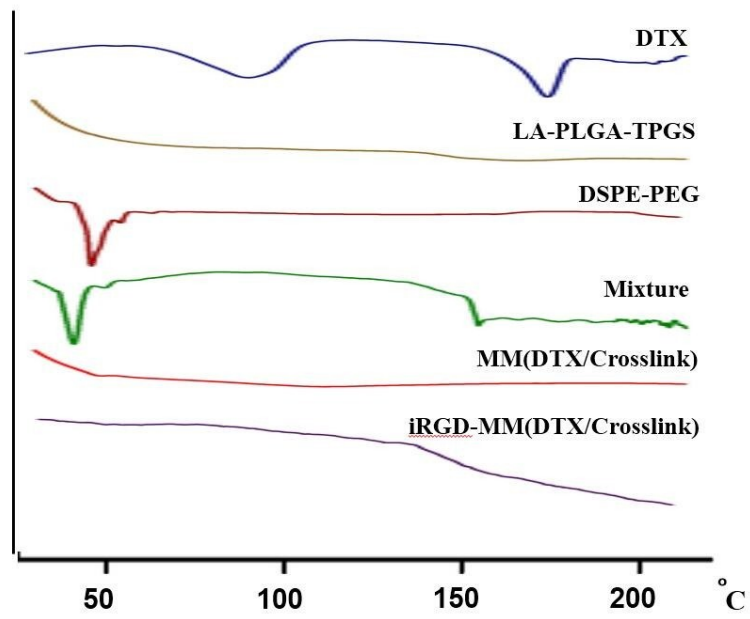

**Fig. S2**  
Differential scanning calorimetry of DTX, LA-PLGA-TPGS, DSPE-PEG, the mixture of the three, MM(DTX/Crosslink), and iRGD-MM(DTX/Crosslink).

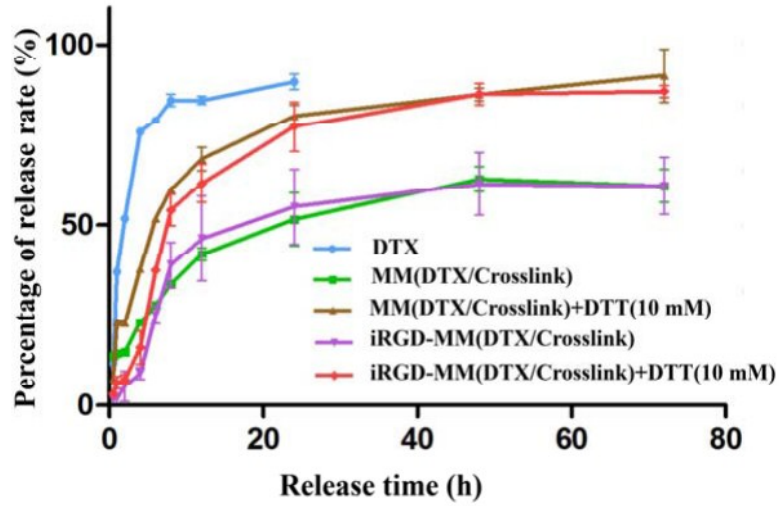

**Fig. S3**

The *in vitro* drug release profiles of iRGD-MM(DTX/Crosslink), MM(DTX/Crosslink), and free DTX.

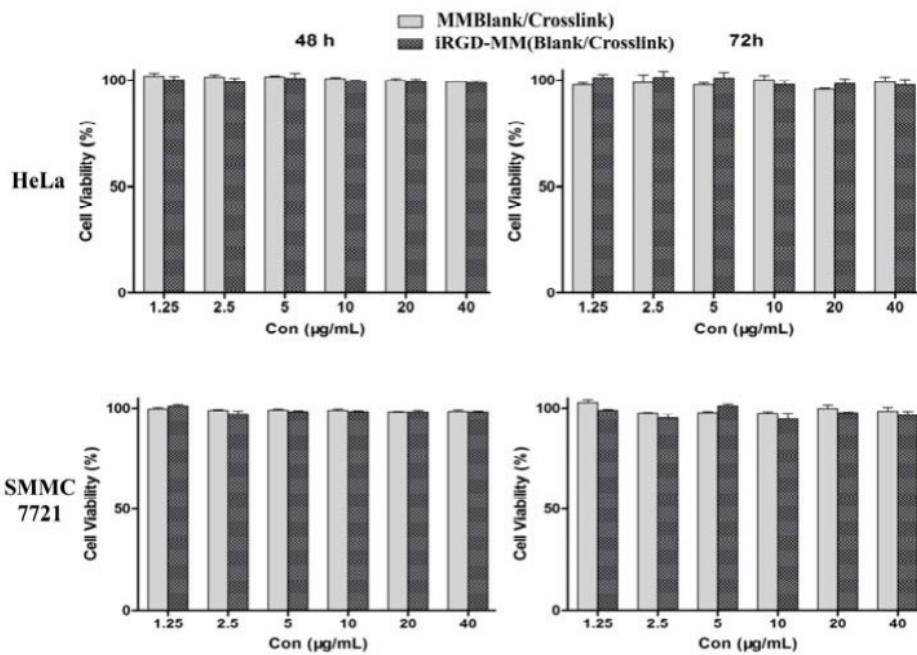

**Fig. S4**

The viability of HeLa and SMMC 7721 cells treated with MM(Blank/Crosslink) and iRGD-MM(Blank/Crosslink).

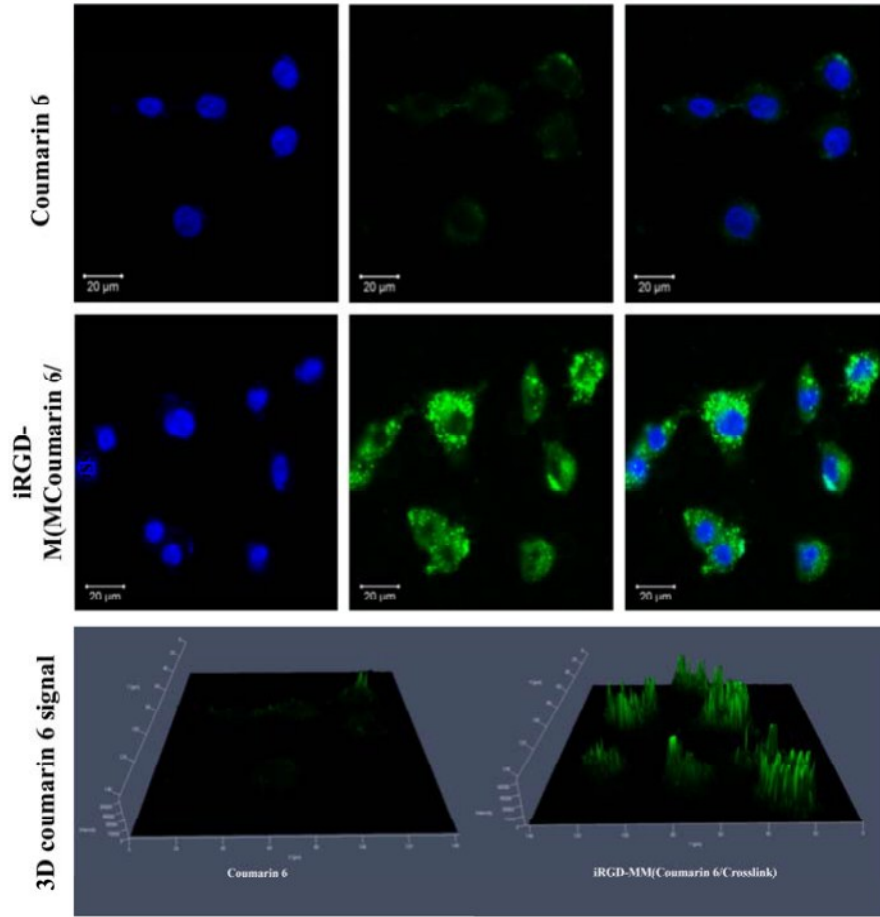

**Fig. S5**

Confocal images of cells treated with free Coumarin 6, MM(Coumarin 6/Non-crosslink), MM(Coumarin 6/Crosslink), and iRGD-MM(Coumarin 6/Crosslink).
